# Supplementary material for: A meet-up of two second messengers: the c-di-AMP receptor DarB controls (p)ppGpp synthesis in Bacillus subtilis
Source: PubMed Central journal article supplement (PMC7900238; doi:10.1038/s41467-021-21306-0), 2021-02-22
Supplement: 41467_2021_21306_MOESM1_ESM.pdf [file 41467_2021_21306_MOESM1_ESM.pdf]

## SUPPLEMENTARY INFORMATION

**A meet-up of two second messengers: The c-di-AMP receptor DarB controls (p)ppGpp synthesis in *Bacillus subtilis***

**Larissa Krüger<sup>1</sup>, Christina Herzberg<sup>1</sup>, Dennis Wicke<sup>1</sup>, Heike Bähre<sup>2</sup>, Jana L. Heidemann<sup>3</sup>, Achim Dickmanns<sup>3</sup>, Kerstin Schmitt<sup>4</sup>, Ralf Ficner<sup>3</sup> and Jörg Stülke<sup>1\*</sup>**

<sup>1</sup> Department of General Microbiology, Institute for Microbiology & Genetics, GZMB, Georg-August-University Göttingen, 37077 Göttingen, Germany

<sup>2</sup> Research Core Unit Metabolomics, Hannover Medical School, 30625 Hannover, Germany

<sup>3</sup> Department of Molecular Structural Biology, Institute for Microbiology & Genetics, GZMB, Georg-August-University Göttingen, 37077 Göttingen, Germany

<sup>4</sup> Department of Molecular Microbiology and Genetics, Service Unit LCMS Protein Analytics, Institute for Microbiology & Genetics, GZMB, Georg-August-University Göttingen, 37077 Göttingen, Germany

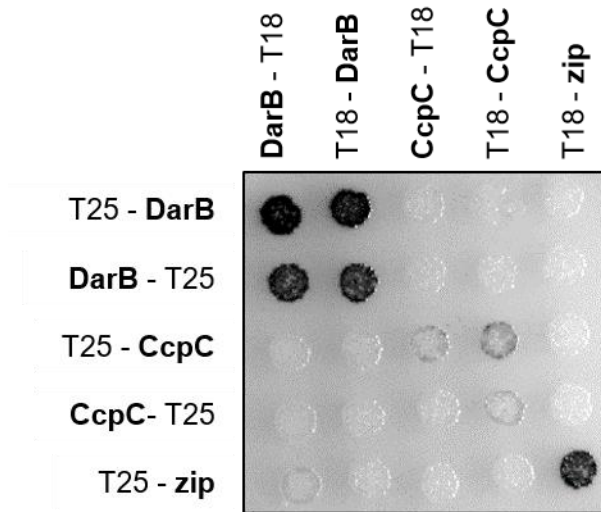

**Supplementary Fig. 1. DarB does not interact with CcpC.** Bacterial two-hybrid (BACTH) experiment testing for the interaction of DarB with CcpC. N- and C-terminal fusions of DarB and the CcpC variants to the T18 or T25 domain of the adenylate cyclase (CyaA) were created and the proteins were tested for interaction in *E. coli* BTH101. Dark colonies indicate an interaction that results in adenylate cyclase activity and subsequent expression of the reporter  $\beta$ -galactosidase. While DarB exhibits self-interaction, no interaction between DarB and CcpC could be detected. The experiment was conducted three times and a representative plate is shown.

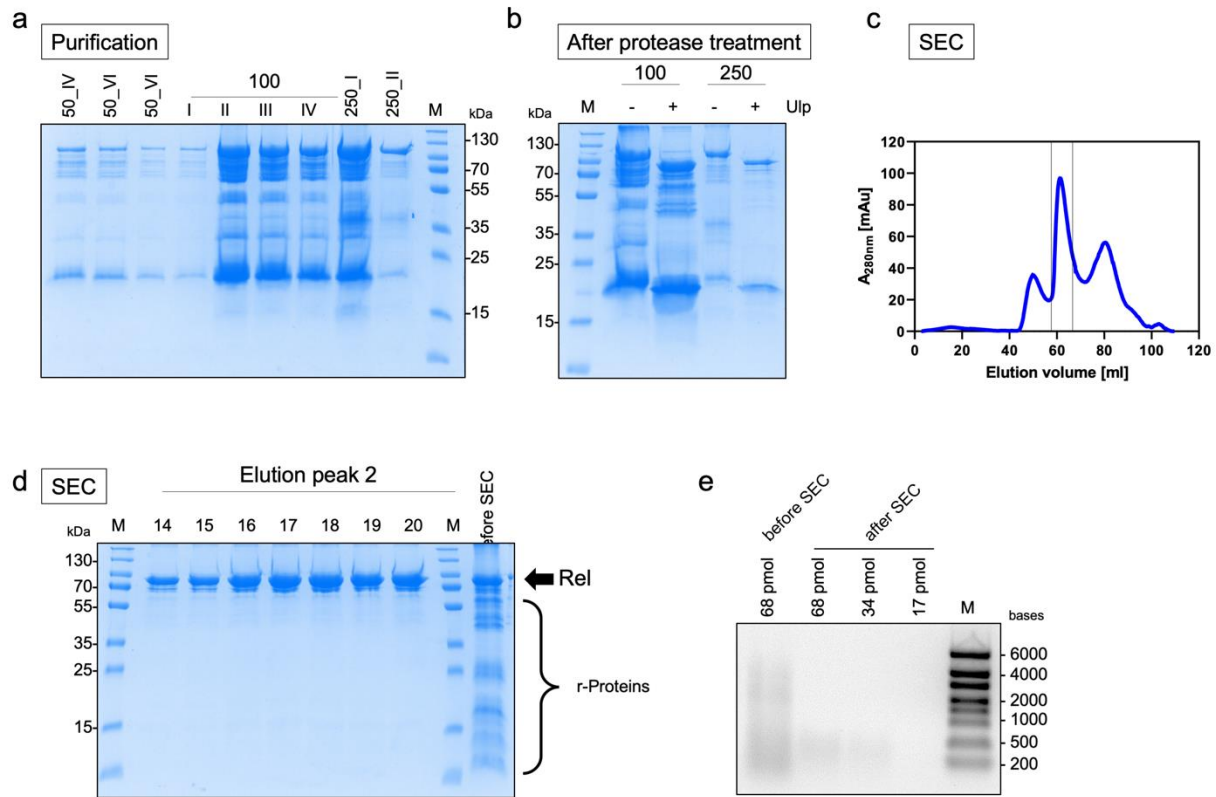

**Supplementary Fig. 2. Purification of Rel.** **a**, 10xHis-SUMO-tagged Rel (pVHP186) was overexpressed in *E. coli* Rosetta DE3 and purified in 750 mM KCl, 5 mM MgCl<sub>2</sub>, 40 μM MnCl<sub>2</sub>, 40 μM Zn(OAc)<sub>2</sub>, 20 mM imidazole, 10% glycerol, 4 mM β-mercaptoethanol, 25 mM HEPES:KOH pH 8 via a Ni<sup>2+</sup>nitrilotriacetic acid column. The protein was eluted with 100 and 250 mM imidazole and the elution fractions were analyzed by SDS-PAGE and Coomassie staining. **b**, The elution fractions were pooled and the 10xHis-SUMO-tag was cut off by overnight incubation with the SUMO protease. **c**, Size exclusion chromatography (SEC) was performed to remove contamination of the protein preparation. Source data are provided as a Source data file. The fractions that were used for the further experiments are highlighted and were analyzed by SDS-PAGE (**d**) and on a denaturing agarose gel to verify the absence of potentially contaminating RNA (**e**). The ratio between A<sub>260</sub>/A<sub>280</sub> was 0.9 indicating that the protein was almost free of contaminating RNA. Rel has been purified more than three times and representative gels are shown.

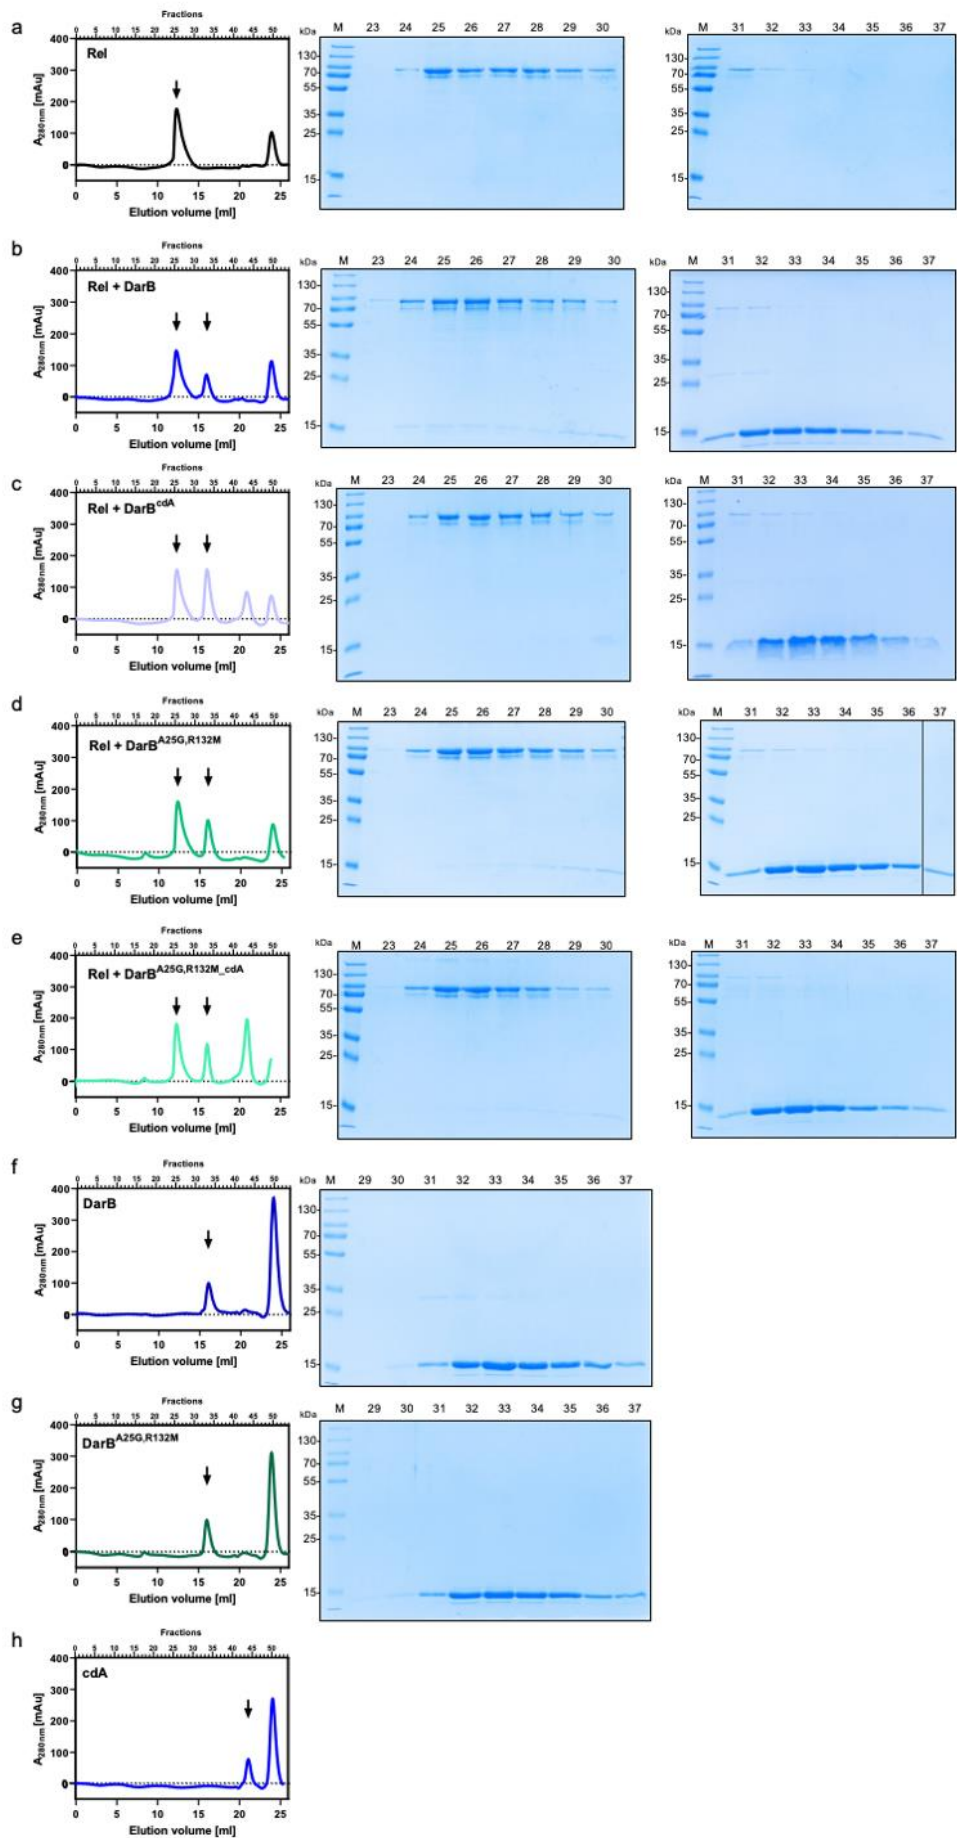

**Supplementary Fig. 3. Analysis of the DarB-Rel-complex by size exclusion chromatography (SEC).**

Chromatograms of the SEC run are shown together with the SDS-gels of the relevant elution fractions (indicated above chromatogram and gel). Rel and DarB were used in equimolar concentrations. SEC runs of Rel alone (a) with DarB (b), DarB<sup>cdA</sup> (c), DarB<sup>A25G,R132M</sup> (d), or DarB<sup>A25G,R132M\_cdA</sup> (e), and as controls DarB (f), DarB<sup>A25G,R132M</sup> (g), and c-di-AMP (h). Source data are provided as a Source data file. Abbreviation: cdA, c-di-AMP.

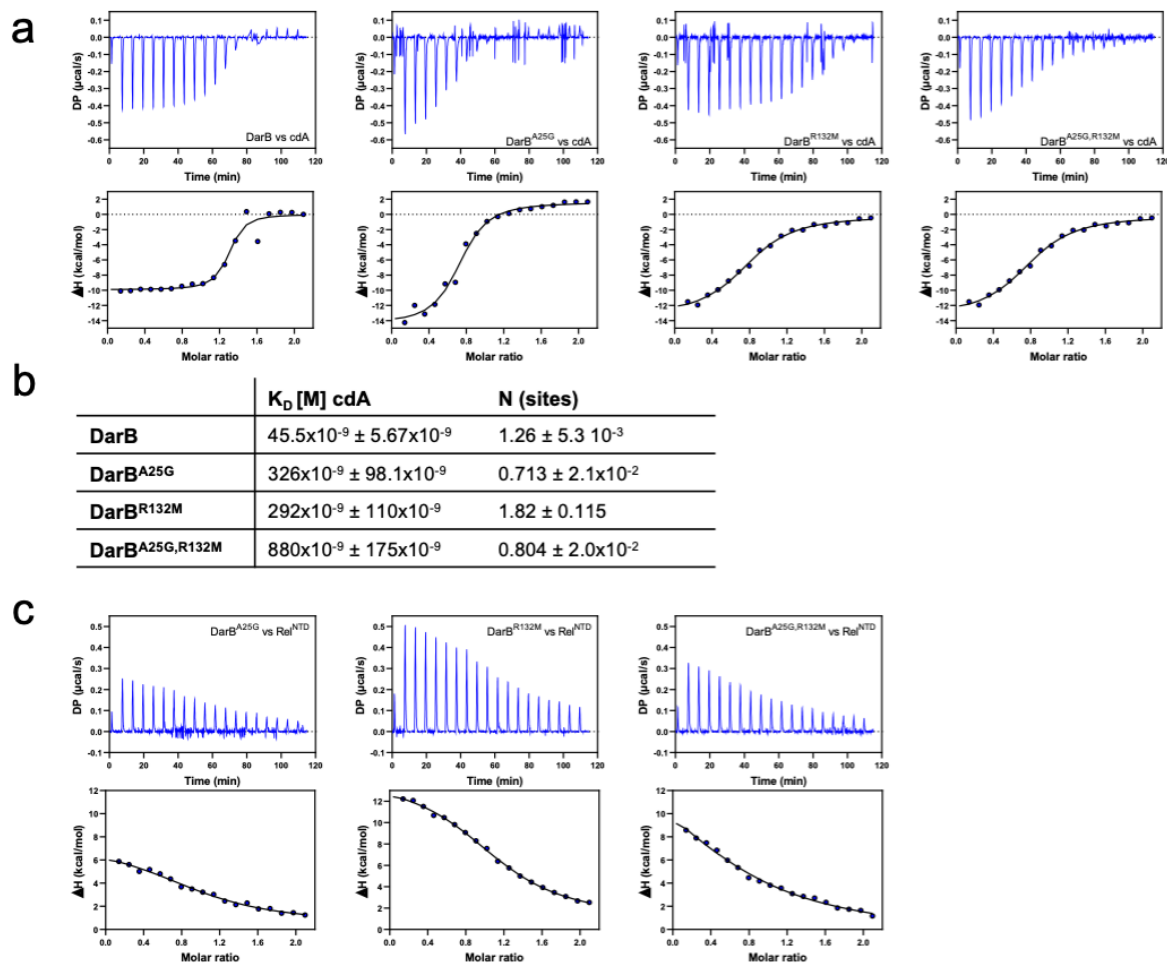

**Supplementary Fig. 4. Analysis of the binding affinities of DarB, and the DarB mutants towards c-di-AMP and Rel<sup>NTD</sup>.** **a**, The ability of the DarB wild type and the mutant proteins to bind c-di-AMP was assessed by Isothermal titration calorimetry (ITC). The cell and the syringe contained 10  $\mu$ M DarB and 100  $\mu$ M c-di-AMP, respectively. Titration profiles and the determined molar ratios. **b**, Calculated  $K_D$  values for binding of c-di-AMP, as well as the determined number of binding ligand sites. **c**, The interaction of the DarB mutant proteins with Rel<sup>NTD</sup> was investigated with ITC. The cell and the syringe contained 10  $\mu$ M Rel and 100  $\mu$ M DarB, respectively. Source data are provided as a Source data file. Abbreviation: cdA, c-di-AMP.

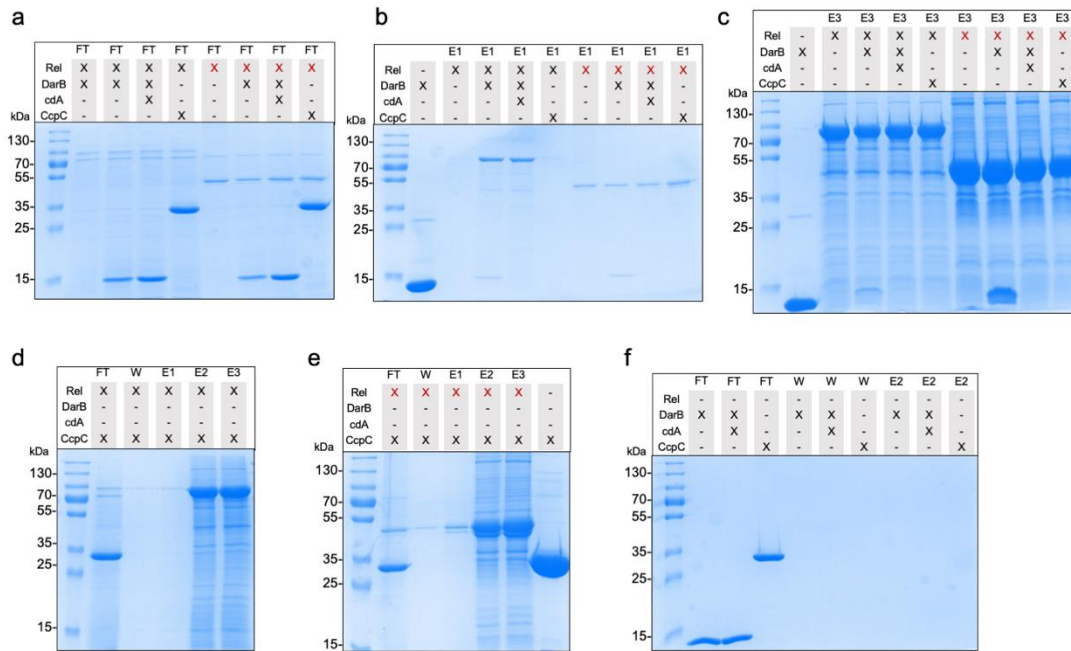

**Supplementary Fig. 5. *In vitro* interaction experiment between DarB and Strep-Rel or Strep-Rel<sup>NTD</sup>.** Strep-Rel or Strep-Rel<sup>NTD</sup> were immobilized onto a StrepTactin column and incubated with DarB, DarB preincubated with c-di-AMP, or the control protein CcpC. The eluates were analyzed by SDS-PAGE. Control gels are shown, the presence of the N-terminal Strep-Rel<sup>NTD</sup> variant is indicated by a red cross. **a**, Flow through (FT) after loading of DarB or CcpC; **b**, Elution fractions 1; **c**, Elution fractions 3; **d**, SDS PAGE showing all fractions of the negative control CcpC and Strep-Rel; **e**, SDS PAGE showing all fractions of the negative control CcpC and Strep-Rel<sup>NTD</sup>; **f**, SDS PAGE with all fractions of DarB/ CcpC to exclude unspecific binding to the column. Abbreviation: cdA, c-di-AMP. The experiment was conducted three times and a representative gel is shown.

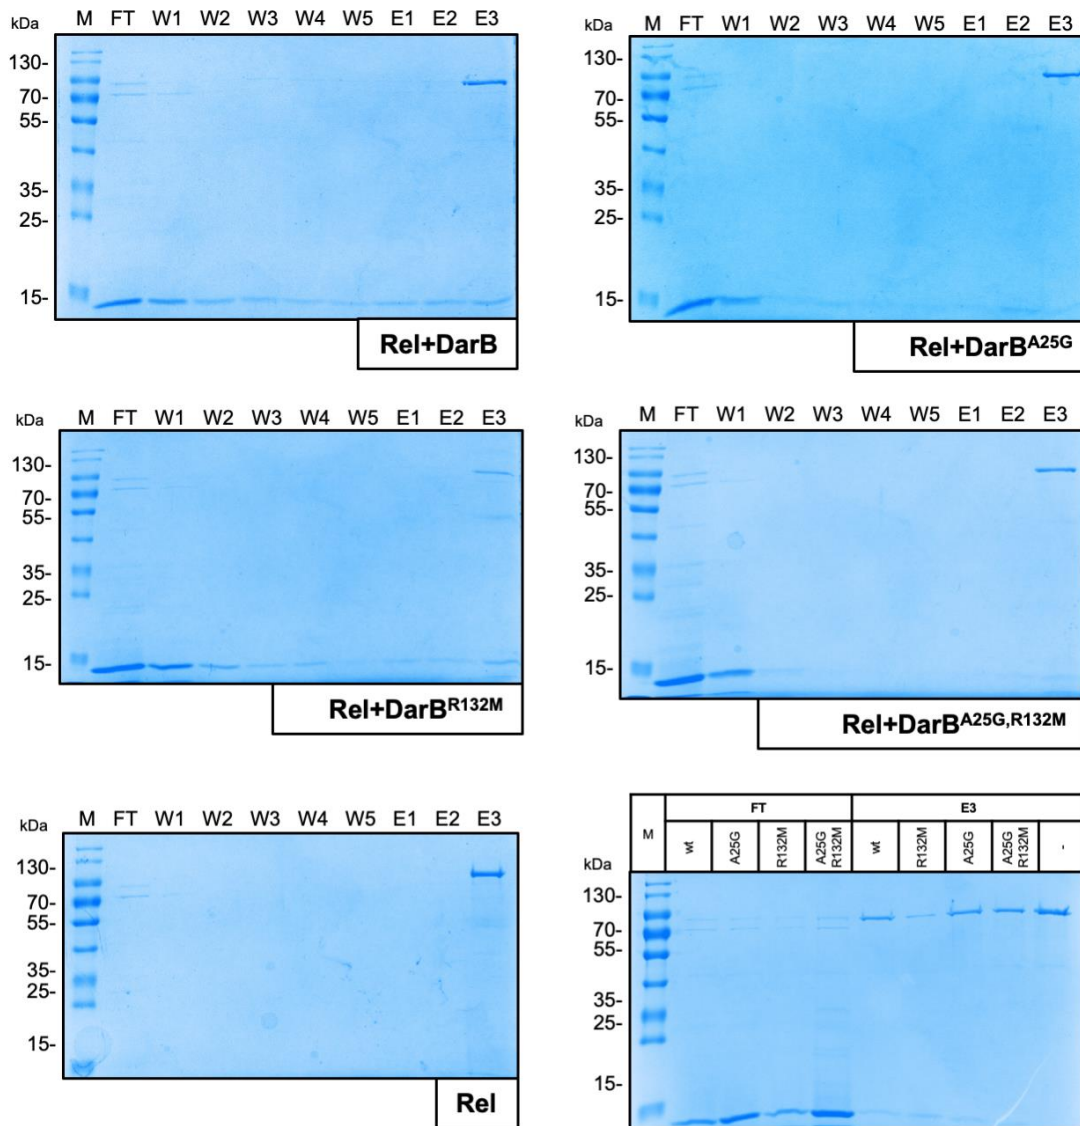

**Supplementary Fig. 6.** *In vitro* interaction experiment between DarB, DarB<sup>A25G</sup>, DarB<sup>R132M</sup>, DarB<sup>A25G,R132M</sup>, and Strep-Rel. Strep-Rel was immobilized onto a StrepTactin column and incubated with DarB, or the DarB mutants. The flow through (FT), the wash fractions (W), and the eluates were analyzed by SDS-PAGE. The experiment was conducted three times and a representative gel is shown.



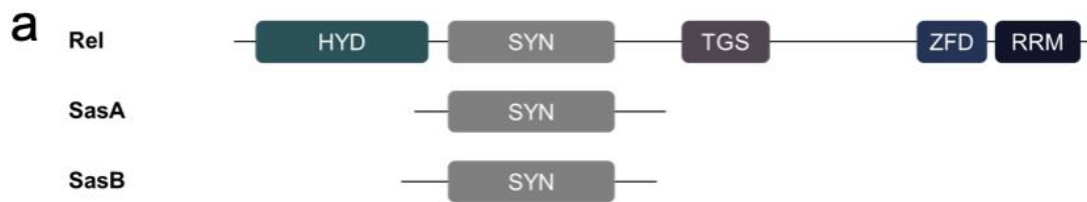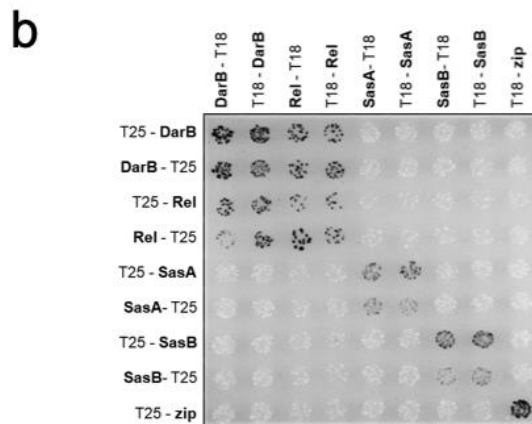

**Supplementary Fig. 7. DarB does not interact with the small alarmone synthetases SasA and SasB.** **a**, Domain organization of Rel and the small alarmone synthetases SasA and SasB. **b**, Bacterial two-hybrid (BACTH) experiment testing for the interaction of DarB with Rel, SasA and SasB. N- and C-terminal fusions of DarB and Rel, SasA or SasB to the T18 or T25 domain of the adenylate cyclase (CyaA) were created and the proteins were tested for interaction in *E. coli* BTH101. Dark colonies indicate an interaction that results in adenylate cyclase activity and subsequent expression of the reporter  $\beta$ -galactosidase. While DarB exhibits an interaction with Rel, no interaction between DarB and SasA or SasB could be detected. The experiment was conducted three times and a representative plate is shown.

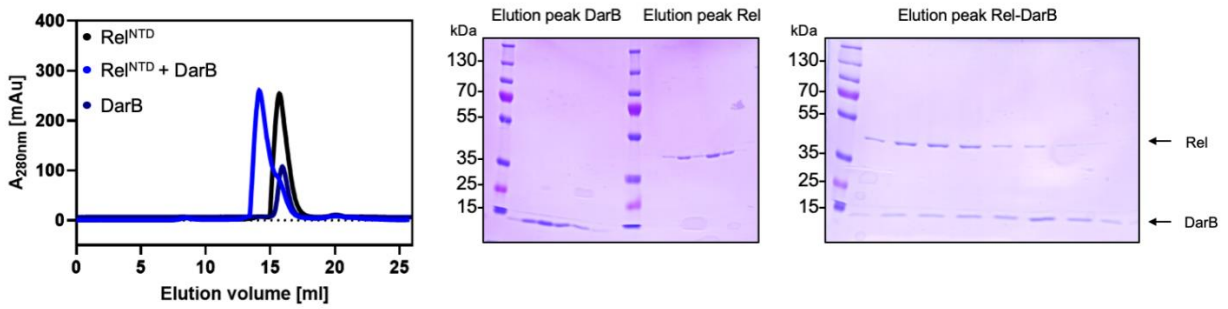

**Supplementary Fig. 8. *In vitro* analysis of the DarB-Rel<sup>NTD</sup> complex.** Size-exclusion chromatography and multi-angle light scattering (SEC-MALS) of DarB (dark blue), Rel (black), and the DarB-Rel<sup>NTD</sup>-complex (blue). Coomassie-stained gels of the relevant elution fractions are depicted next to the chromatogram. Source data are provided as a Source data file.

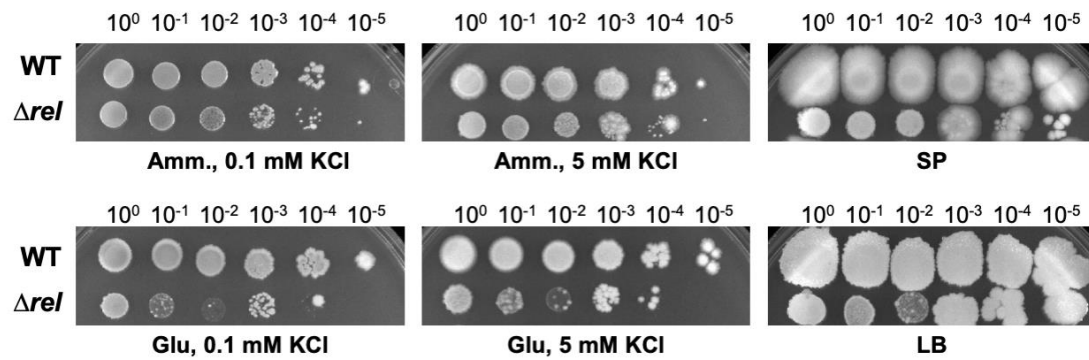

**Supplementary Fig. 9. Phenotypes of a *B. subtilis rel* mutant.** Growth assay of *B. subtilis* wild type, and GP3419 ( $\Delta rel$ ). The *B. subtilis* strains were cultivated in MSSM minimal medium with 0.1 mM KCl and ammonium. The cells were harvested, washed, and the OD<sub>600</sub> was adjusted to 1.0. Serial dilutions were dropped onto MSSM minimal plates with the indicated potassium concentration and ammonium or glutamate, or on sporulation (SP) and LB complex medium plates. The growth experiment was conducted three times and representative plates are shown.

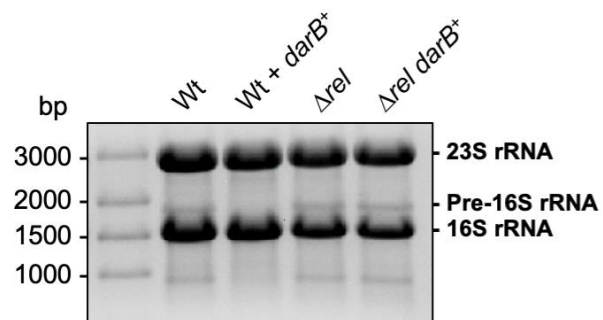

**Supplementary Fig. 10. Analysis of rRNA profiles in *B. subtilis* mutants.** Cultures were grown in minimal medium with 0.1 mM KCl. Total RNA was extracted and 3  $\mu$ g were resolved on a 1% agarose formaldehyde gel and stained with ethidium bromide. Positions of the ribosomal rRNAs are indicated. The experiment was conducted three times and a representative RNA gel is shown.

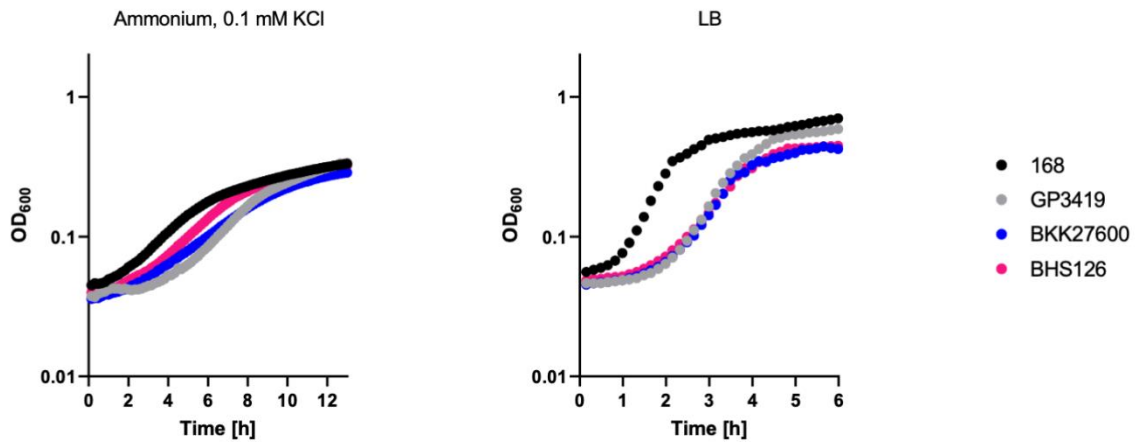

**Supplementary Fig. 11. Phenotypes of a *B. subtilis rel* mutants.** Growth experiments of the *B. subtilis* wild type strain 168 and the isogenic  $\Delta rel$  mutants GP3419, BHS126, and BKK27600 in MSSM minimal medium with 0.1 mM KCl (left) or in complex medium (lysogeny broth) (right). Growth was monitored in an Epoch 2 Microplate Spectrophotometer (BioTek Instruments) at 37°C with linear shaking at 237 rpm (4 mm) for 12 h. The growth experiment was conducted three times and representative curves from one experiment are shown. Source data are provided as a Source data file.

Full scan Figure 1c

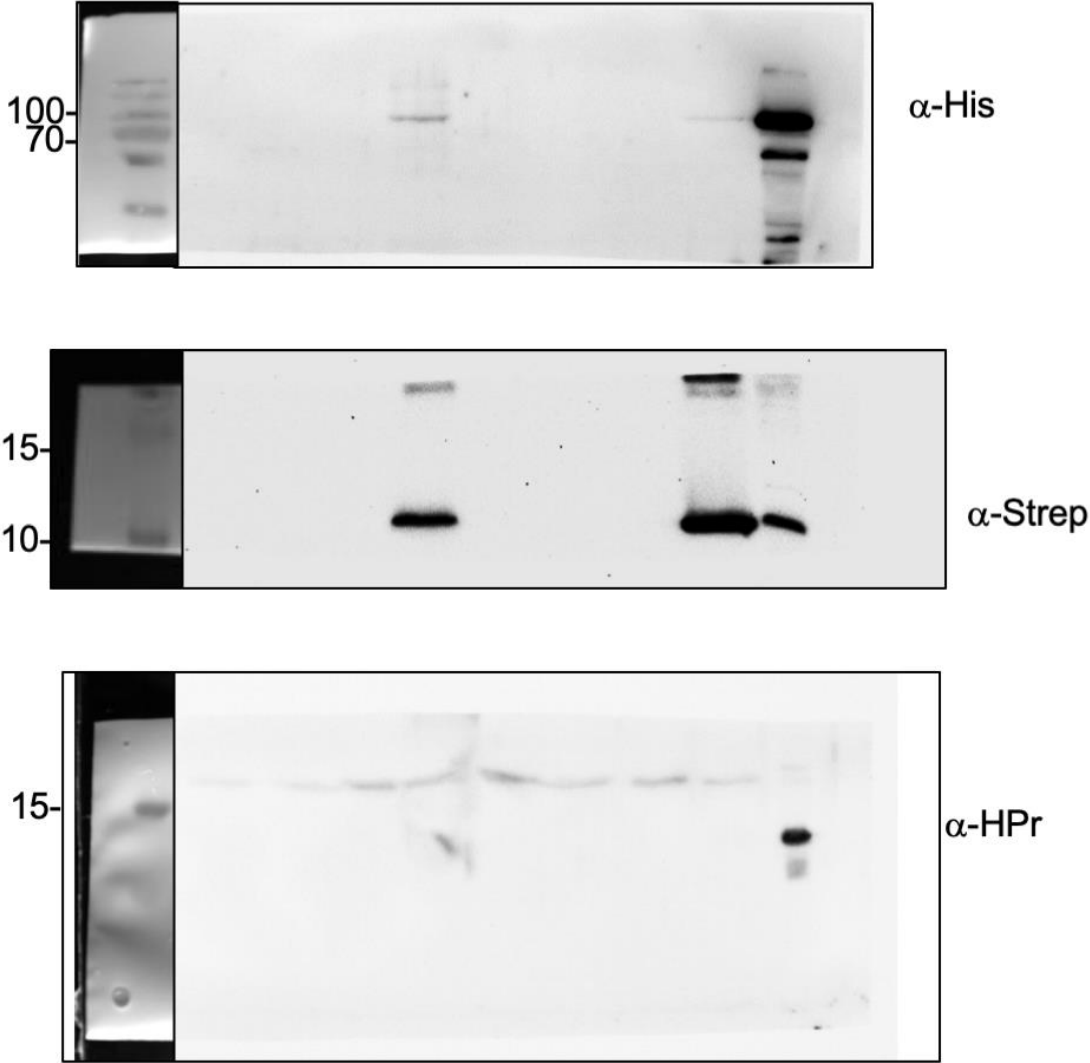

Supplementary Fig. 12. Uncropped images for Figure 1c.

## Supplementary Table 1

### Analysis of excised gel bands from the *in vitro* pulldown experiment with Strep-Rel

Peptides identified by search of MS/MS2 data against *B. subtilis* specific protein database (UniProt Proteome ID UP000001570)

#### List of the samples

|      |                                                           |
|------|-----------------------------------------------------------|
| LK29 | Excised gel band 1 (Rel, DarB)                            |
| LK30 | Excised gel band 2 (Rel, DarB, c-di-AMP)                  |
| LK31 | Excised gel band 3 (Rel <sup>NTD</sup> , DarB)            |
| LK32 | Excised gel band 4 (Rel <sup>NTD</sup> ), DarB, c-di-AMP) |

| LK29      |             |              |                               |                                    |
|-----------|-------------|--------------|-------------------------------|------------------------------------|
| Accession | Description | Coverage (%) | Number of identified peptides | Number of peptide sequence matches |
| O31698    | DarB        | 89           | 8                             | 576                                |
| O54408    | Rel         | 24           | 14                            | 140                                |

| LK30      |             |              |                               |                                    |
|-----------|-------------|--------------|-------------------------------|------------------------------------|
| Accession | Description | Coverage (%) | Number of identified peptides | Number of peptide sequence matches |
| O54408    | Rel         | 41           | 30                            | 234                                |
| O31698    | DarB        | 89           | 8                             | 164                                |
| Q06796    | RplK        | 6            | 1                             | 2                                  |

|        |      |   |   |   |
|--------|------|---|---|---|
| P12877 | RpIE | 7 | 1 | 2 |
|--------|------|---|---|---|

| <b>LK31</b>      |                    |                     |                                      |                                           |
|------------------|--------------------|---------------------|--------------------------------------|-------------------------------------------|
| <b>Accession</b> | <b>Description</b> | <b>Coverage (%)</b> | <b>Number of identified peptides</b> | <b>Number of peptide sequence matches</b> |
| O31698           | DarB               | 89                  | 11                                   | 1659                                      |
| O54408           | Rel                | 24                  | 13                                   | 193                                       |
| Q06796           | RpIK               | 6                   | 1                                    | 3                                         |

| <b>LK32</b>      |                    |                     |                                      |                                           |
|------------------|--------------------|---------------------|--------------------------------------|-------------------------------------------|
| <b>Accession</b> | <b>Description</b> | <b>Coverage (%)</b> | <b>Number of identified peptides</b> | <b>Number of peptide sequence matches</b> |
| O31698           | DarB               | 89                  | 8                                    | 212                                       |
| O54408           | Rel                | 29                  | 20                                   | 118                                       |
| P18156           | GlpF               | 10                  | 1                                    | 1                                         |
| P54469           | YqfD               | 2                   | 1                                    | 1                                         |



## Supplementary Table 2

Plasmids used in this study

| Name    | Vector                | Insert                                                      | Reference  |
|---------|-----------------------|-------------------------------------------------------------|------------|
| pGP635  | pGP380/ XbaI + PstI   | PCR-Product <i>darB</i> , TK01/TK02 (XbaI + PstI)           | This study |
| pGP706  | pWH844/ Sall          | PCR-Prod. <i>ccpC</i> , HMB9/HMB11/ (Sall)                  | 1          |
| pGP767  | pGP382/ XbaI + PstI   | PCR-Prod. <i>darB</i> , TK03/TK04 (XbaI + PstI)             | This study |
| pGP2972 | pET-SUMO/ BsaI + XhoI | PCR-Prod. <i>darB</i> , LK80/LK81 (BsaI + XhoI)             | This study |
| pGP2974 | pUT18/ XbaI + KpnI    | PCR- Prod. <i>darB</i> , LK130/LK131 (XbaI + KpnI)          | This study |
| pGP2975 | pUT18c/ XbaI + KpnI   | PCR- Prod. <i>darB</i> , LK130/LK131 (XbaI + KpnI)          | This study |
| pGP2976 | pKT25/ XbaI + KpnI    | PCR- Prod. <i>darB</i> , LK130/LK131 ( <i>XbaI + KpnI</i> ) | This study |
| pGP2977 | p25-N/ XbaI + KpnI    | PCR- Prod. <i>darB</i> , LK130/LK131 (XbaI + KpnI)          | This study |
| pGP2982 | pUT18/ XbaI + KpnI    | PCR- Prod. <i>ccpC</i> , LK161/LK162 ( <i>XbaI + KpnI</i> ) | This study |
| pGP2983 | pUT18c/ XbaI + KpnI   | PCR- Prod. <i>ccpC</i> , LK161/LK162 (XbaI + KpnI)          | This study |
| pGP2984 | pKT25/ XbaI + KpnI    | PCR- Prod. <i>ccpC</i> , LK161/LK162 (XbaI + KpnI)          | This study |
| pGP2985 | p25-N/ XbaI + KpnI    | PCR- Prod. <i>ccpC</i> , LK161/LK162 (XbaI + KpnI)          | This study |
| pGP3306 | pBQ200/ XbaI + PstI   | PCR-Prod. <i>darB</i> , LK209/TK02 (XbaI + PstI)            | This study |
| pGP3330 | pWH844/ BamHI + Sall  | PCR-Prod. <i>rel</i> , LK283/LK284 (BamHI + Sall)           | This study |
| pGP3336 | pUT18/ XbaI + KpnI    | PCR- Prod. <i>sasA</i> , LK312/LK313 (XbaI + KpnI)          | This study |
| pGP3337 | pUT18c/ XbaI + KpnI   | PCR- Prod. <i>sasA</i> , LK312/LK313 (XbaI + KpnI)          | This study |
| pGP3338 | pKT25/ XbaI + KpnI    | PCR- Prod. <i>sasA</i> , LK312/LK313 (XbaI + KpnI)          | This study |
| pGP3339 | p25-N/ XbaI + KpnI    | PCR- Prod. <i>sasA</i> , LK312/LK313 (XbaI + KpnI)          | This study |
| pGP3344 | pUT18/ XbaI + KpnI    | PCR- Prod. <i>rel</i> , LK287/LK288 (XbaI + KpnI)           | This study |
| pGP3345 | pUT18c/ XbaI + KpnI   | PCR- Prod. <i>rel</i> , LK287/LK288 (XbaI + KpnI)           | This study |

|         |                       |                                                                            |            |
|---------|-----------------------|----------------------------------------------------------------------------|------------|
| pGP3346 | pKT25/ XbaI + KpnI    | PCR- Prod. <i>rel</i> , LK287/LK288 (XbaI + KpnI)                          | This study |
| pGP3347 | p25-N/ XbaI + KpnI    | PCR- Prod. <i>rel</i> , LK287/LK288 (XbaI + KpnI)                          | This study |
| pGP3348 | pGP172/ KpnI + BamHI  | PCR-Prod. <i>rel</i> LK310/LK311 (KpnI + BamHI)                            | This study |
| pGP3350 | pGP172/ KpnI + BamHI  | PCR-Produkt <i>rel</i> <sup>NTD</sup> LK310/LK333 (KpnI + BamHI)           | This study |
| pGP3411 | pUT18/ XbaI + KpnI    | PCR- Prod. <i>sasB</i> , LK314/LK315 (XbaI + KpnI)                         | This study |
| pGP3412 | pUT18c/ XbaI + KpnI   | PCR- Prod. <i>sasB</i> , LK314/LK315 (XbaI + KpnI)                         | This study |
| pGP3413 | pKT25/ XbaI + KpnI    | PCR- Prod. <i>sasB</i> , LK314/LK315 (XbaI + KpnI)                         | This study |
| pGP3414 | p25-N/ XbaI + KpnI    | PCR- Prod. <i>sasB</i> , LK314/LK315 (XbaI + KpnI)                         | This study |
| pGP3415 | pUT18/ XbaI + KpnI    | PCR- Prod. <i>rel</i> <sup>SYN-RRM</sup> , LK316/LK288 (XbaI + KpnI)       | This study |
| pGP3416 | pUT18c/ XbaI + KpnI   | PCR- Prod. <i>rel</i> <sup>SYN-RRM</sup> , LK316/LK288 (XbaI + KpnI)       | This study |
| pGP3417 | pKT25/ XbaI + KpnI    | PCR- Prod. <i>rel</i> <sup>SYN-RRM</sup> , LK316/LK288 (XbaI + KpnI)       | This study |
| pGP3418 | p25-N/XbaI + KpnI     | PCR- Prod. <i>rel</i> <sup>SYN-RRM</sup> , LK316/LK288 (XbaI + KpnI)       | This study |
| pGP3419 | pUT18/ XbaI + KpnI    | PCR- Prod. <i>rel</i> <sup>NTD</sup> , LK287/LK317 (XbaI + KpnI)           | This study |
| pGP3420 | pUT18c/ XbaI + KpnI   | PCR- Prod. <i>rel</i> <sup>NTD</sup> , LK287/LK317 (XbaI + KpnI)           | This study |
| pGP3421 | pKT25/ XbaI + KpnI    | PCR- Prod. <i>rel</i> <sup>NTD</sup> , LK287/LK317 (XbaI + KpnI)           | This study |
| pGP3422 | p25-N/ XbaI + KpnI    | PCR- Prod. <i>rel</i> <sup>NTD</sup> , LK287/LK317 (XbaI + KpnI)           | This study |
| pGP3429 | pWH844/ BamHI + Sall  | PCR-Prod. <i>rel</i> <sup>NTD</sup> , LK283 + LK358 (BamHI + Sall)         | This study |
| pGP3437 | pBQ200/ XbaI + PstI   | PCR-Prod. <i>darB</i> <sup>A25G</sup> , LK209+ TK02 + LK372 (XbaI + PstI)  | This study |
| pGP3441 | pBQ200/ XbaI + PstI   | PCR-Prod. <i>darB</i> <sup>R132M</sup> , LK209+ TK02 + LK376 (XbaI + PstI) | This study |
| pGP3444 | pET-SUMO/ XhoI + BsaI | PCR-Prod. <i>darB</i> <sup>A25G</sup> , LK80 + LK81 (XhoI + BsaI)          | This study |

|         |                    |                                                                                 |            |
|---------|--------------------|---------------------------------------------------------------------------------|------------|
| pGP3448 | pET-SUMO/XhoI+BsaI | PCR-Prod. <i>darB</i> <sup>R132M</sup> , LK80 + LK81 (XhoI + BsaI)              | This study |
| pGP3460 | pET-SUMO/XhoI+BsaI | PCR-Prod. <i>darB</i> <sup>A25G/R132M</sup> , LK80 + LK81 (XhoI + BsaI)         | This study |
| pGP3601 | pBQ200/XbaI+PstI   | PCR-Prod. <i>darB</i> <sup>A25G,R132M</sup> , LK209+ TK02 + LK376 (XbaI + PstI) | This study |
| pVHP186 | pET24d             | <i>rel</i>                                                                      | 2          |

### Supplementary Table 3

Oligonucleotides used in this study

Underlined: restriction sites; bold: introduction of additional bases or mutations; fwd: forward primer; rev: reverse primer; RBS: ribosomal binding site.

| Name  | Sequence                                                            | Gene/purpose                                                          | Remarks                                                     |
|-------|---------------------------------------------------------------------|-----------------------------------------------------------------------|-------------------------------------------------------------|
| LK80  | AAAG <u>GTCTCAT</u> GGTATGATAAGCTTACAATC<br>AGATCAACTTCTTGAGG       | fw, <i>darB</i> , N-terminal<br>6xHis-tag fusion in<br>pET-SUMOadapt  | <i>BsaI</i> ; ATGGT extra for<br>proper cloning             |
| LK81  | TTT <u>CTCGAGCT</u> ACTTATTCAATGAGCGTATAT<br>GCTTATTCAATTCC         | rev, <i>darB</i> , N-terminal<br>6xHis-tag fusion in<br>pET-SUMOadapt | <i>XhoI</i>                                                 |
| LK130 | AAATCTAGAGATGATAAGCTTACAATCAGAT<br>CAACTTCTTGAGG                    | fwd, <i>darB</i> bacterial<br>two hybrid, <i>XbaI</i>                 | Extra base to restore<br>reading frame, <i>XbaI</i>         |
| LK131 | TTT <u>GGTACCCGCT</u> TATTCAATGAGCGTATATG<br>CTTATTCAATTCC          | rev, <i>darB</i> bacterial<br>two hybrid, <i>KpnI</i>                 | Two extra bases to<br>restore reading frame,<br><i>KpnI</i> |
| LK161 | AAATCTAGAGATGCAGCTTCAAGAGCTTCAT<br>ATGCTCG                          | fwd, <i>ccpC</i> bacterial<br>two hybrid, <i>XbaI</i>                 | Extra base to restore<br>reading frame, <i>XbaI</i>         |
| LK162 | TTT <u>GGTACCGCAA</u> ATGGATTTTCTGATCCAG<br>CATATCCTTTATCA          | rev, <i>ccpC</i> bacterial<br>two hybrid, <i>KpnI</i>                 | Two extra bases to<br>restore reading frame,<br><i>KpnI</i> |
| LK209 | AAATCTAGAATTAAGAGGAGAAATTA<br>TGATAAGCTTACAATCAGATCAACTTCTTGAG<br>G | fw, <i>darB</i> , pBQ200                                              | <i>XbaI</i> , + RBS                                         |
| LK283 | AAAGGATCCATGGCGAACGAACAAGTATTGA<br>CT                               | fw, <i>rel</i> , pWH844                                               | <i>BamHI</i>                                                |
| LK284 | TTTGTCGACTTAGTTCATGACGCGGCGCA                                       | rev, <i>rel</i> , pWH844                                              | <i>Sall</i>                                                 |

|       |                                                 |                                                                                                 |                                                              |
|-------|-------------------------------------------------|-------------------------------------------------------------------------------------------------|--------------------------------------------------------------|
| LK287 | AAATCTAGAGATGGCGAACGAACAAGTATTG<br>ACT          | fwd, <i>rel</i> bacterial two<br>hybrid, <i>Xba</i> I                                           | Extra base to restore<br>reading frame, <i>Xba</i> I         |
| LK288 | TTTGGTACCGCGTTCATGACGCGGCGCA                    | rev, <i>rel</i> bacterial two<br>hybrid, <i>Kpn</i> I                                           | Two extra bases to<br>restore reading frame,<br><i>Kpn</i> I |
| LK310 | AAAGGTACCAATGGCGAACGAACAAGTATTG<br>ACT          | fw, <i>rel</i> , N-terminal<br>Strep-tag fusion in<br>pGP172                                    | Extra base to restore<br>reading frame, <i>Kpn</i> I         |
| LK311 | TTTGGATCCTTAGTTCATGACGCGGCGCA                   | rev, <i>rel</i> , N-terminal<br>Strep-tag fusion in<br>pGP172                                   | <i>Bam</i> HI                                                |
| LK312 | AAATCTAGAGATGGATTTATCTGTAACACATA<br>TGGAC       | fwd, <i>sasA</i> bacterial<br>two hybrid, <i>Xba</i> I                                          | Extra base to restore<br>reading frame, <i>Xba</i> I         |
| LK313 | TTTGGTACCGCATCCACTTCTTTCTTAATCCCC<br>AG         | rev, <i>sasA</i> bacterial<br>two hybrid, <i>Kpn</i> I                                          | Two extra bases to<br>restore reading frame,<br><i>Kpn</i> I |
| LK314 | AAATCTAGAGATGGATGACAAACAATGGGA<br>GC            | fwd, <i>sasB</i> bacterial<br>two hybrid, <i>Xba</i> I                                          | Extra base to restore<br>reading frame, <i>Xba</i> I         |
| LK315 | TTTGGTACCGCTTGTTGCTCGCTCCTTTTTTC<br>TTTC        | rev, <i>sasB</i> bacterial<br>two hybrid, <i>Kpn</i> I                                          | Two extra bases to<br>restore reading frame,<br><i>Kpn</i> I |
| LK316 | AAATCTAGAGCTGGAAATTTTTGCTCCTTTGG<br>C           | fwd, <i>rel</i> <sup>SYN-RRM</sup> ,<br>bacterial two hybrid/<br>pGP888, <i>Xba</i> I           | Extra base to restore<br>reading frame, <i>Xba</i> I         |
| LK317 | TTTGGTACCGCAGAGAACAAATCAATTTTGA<br>GCGATTC      | rev, <i>rel</i> <sup>NTD</sup> , bacterial<br>two hybrid, <i>Kpn</i> I                          | Two extra bases to<br>restore reading frame,<br><i>Kpn</i> I |
| LK333 | TTTGGATCCTTATTAAGAGAACAAATCAATTT<br>TGAGCGATTC  | rev, <i>rel</i> <sup>NTD</sup> , N-<br>terminal Strep-tag<br>fusion in pGP172,<br><i>Bam</i> HI | <i>Bam</i> HI + 2xSTOPP                                      |
| LK358 | TTTGTCTGACTCATCAAGAGAACAAATCAATTT<br>TGAGCGATTC | rev, <i>rel</i> <sup>NTD</sup> , N-<br>terminal Strep-tag<br>fusion in pWH844                   | STOPP + <i>Sal</i> I                                         |

|       |                                               |                                                                 |             |
|-------|-----------------------------------------------|-----------------------------------------------------------------|-------------|
| LK372 | [Phos]GCGGACAAAGTAGGGCACGTGCAAGT              | CCR-Primer <i>darB</i><br>(A25G)                                | 5'-P        |
| LK376 | [Phos]ACAAAAACCGGATACGTGCCATCCC               | CCR-Primer <i>darB</i><br>(T46V)                                | 5'-P        |
| TK01  | AAATCTAGAATGATAAGCTTACAATCAGATC<br>AACTTCTTG  | fwd, <i>darB</i> , N-<br>terminal Strep-tag<br>fusion in pGP380 | <i>XbaI</i> |
| TK02  | TTTCTGCAGCTACTTATTCAATGAGCGTATAT<br>GCTTATTCA | rev, <i>darB</i> , N-terminal<br>Strep-tag fusion in<br>pGP380  | <i>PstI</i> |

## References

1. Blencke, H. M. et al. Regulation of *citB* expression in *Bacillus subtilis*: Integration of multiple metabolic signals in the citrate pool and by the general nitrogen regulatory system. *Arch. Microbiol.* **185**, 136-146 (2006).
2. Takada, H., et al. The C-terminal RRM/ACT domain is crucial for fine-tuning the activation of “long” RelA-SpoT homolog enzymes by ribosomal complexes. *Front. Microbiol.* **11**, 277 (2020).
